# Supplementary material for: An Assessment of Mushroom Consumption on Cardiometabolic Disease Risk Factors and Morbidities in Humans: A Systematic Review
Source: MDPI journal article supplement (doi:10.3390/nu15051079), 2023-02-21
Supplement: s1 [file s1]

Table S1. NHLBI Study Quality Assessment Tool for Controlled Intervention Studies.

|                         | Randomization | Adequate method of randomization | Concealed treatment allocation | Blinded participants and providers | Blinded outcomes assessors | Groups similar at baseline | Overall dropout rate ≤20% | Differential dropout rate ≤15% | High adherence to intervention | Other interventions avoided or similar | Valid, reliable, and consistent assessment of outcomes | Sufficiently large sample size * | Prespecified outcomes prior to analysis | Intention-to-treat analysis | Overall Rating |
|-------------------------|---------------|----------------------------------|--------------------------------|------------------------------------|----------------------------|----------------------------|---------------------------|--------------------------------|--------------------------------|----------------------------------------|--------------------------------------------------------|----------------------------------|-----------------------------------------|-----------------------------|----------------|
| Agrawal et al., 2010    | ✓             | ?                                | ✓                              | ✓                                  | ✓                          | ✗                          | ✓                         | ✗                              | ?                              | ✓                                      | ✓                                                      | ?                                | ✓                                       | ✗                           | Poor           |
| Dai et al., 2015        | ✓             | ✓                                | ✓                              | ?                                  | ?                          | ?                          | ✓                         | ✗                              | ✓                              | ✓                                      | ✓                                                      | ✓                                | ✓                                       | ✓                           | Fair           |
| Jayasuriya et al., 2015 | ✓             | ✗                                | ✓                              | ✗                                  | ?                          | ?                          | ?                         | ?                              | ?                              | ?                                      | ✓                                                      | ?                                | ✓                                       | ?                           | Poor           |
| Maruyama et al., 2021   | ✓             | ✓                                | ✓                              | ✓                                  | ✓                          | ✓                          | ✓                         | ✓                              | ?                              | ✓                                      | ✓                                                      | ✓                                | ✓                                       | ✓                           | Good           |
| Poddar et al., 2013     | ✓             | ?                                | ?                              | ✗                                  | ✓                          | ✓                          | ✗                         | ?                              | ✗                              | ✓                                      | ✓                                                      | ?                                | ✓                                       | ✗                           | Poor           |
| Spim et al., 2021       | ✓             | ✓                                | ✓                              | ✓                                  | ✓                          | ✓                          | ✗                         | ✗                              | ?                              | ✓                                      | ✓                                                      | ?                                | ✓                                       | ?                           | Poor           |
| Schneider et al., 2011  | ✓             | ✗                                | ?                              | ?                                  | ?                          | ✓                          | ✓                         | ✓                              | ?                              | ✓                                      | ✓                                                      | ?                                | ✓                                       | ✗                           | Poor           |
| Sun and Niu, 2020       | ✓             | ✓                                | ✓                              | ✗                                  | ?                          | ✓                          | ✓                         | ✓                              | ✓                              | ✓                                      | ✓                                                      | ✓                                | ✓                                       | ✗                           | Poor           |

\* A sufficiently large sample size had to be able to detect a difference in the main outcome between groups with at least >80% power. ✓ - Yes. ✗ - No. ? - Not reported by the authors in the original manuscript.

Table S2. NHLBI Study Quality Assessment Tool for Pre-Post Studies Without a Control Group.

|                       | Objective study question | Clearly prespecified eligibility and selection criteria | Participants are representative of the population of interest | All participants meeting entry criteria enrolled | Sample size large enough to provide confidence in findings | Clearly described and consistently delivered intervention | Prespecified, defined, valid, reliable, consistent outcome measures | Blinded assessors | Loss to follow-up ≤20%, loss accounted for in analysis | Statistical tests examined changes from pre- to post- intervention | Outcomes are taken multiple times before and after the intervention | Statistical analysis accounted for individual-level data | Overall rating |
|-----------------------|--------------------------|---------------------------------------------------------|---------------------------------------------------------------|--------------------------------------------------|------------------------------------------------------------|-----------------------------------------------------------|---------------------------------------------------------------------|-------------------|--------------------------------------------------------|--------------------------------------------------------------------|---------------------------------------------------------------------|----------------------------------------------------------|----------------|
| Abrams et al., 2011   | ✓                        | ✓                                                       | ✗                                                             | ✗                                                | ✗                                                          | ✓                                                         | ✓                                                                   | ✗                 | ✓                                                      | ✓                                                                  | ✗                                                                   | NA                                                       | Poor           |
| Harada et al., 2016   | ✓                        | ✗                                                       | ?                                                             | ?                                                | ?                                                          | ✓                                                         | ✓                                                                   | ?                 | ?                                                      | ✓                                                                  | ✗                                                                   | NA                                                       | Poor           |
| Mehrotra et al., 2014 | ✓                        | ✓                                                       | ✓                                                             | ✓                                                | ✗                                                          | ✓                                                         | ✓                                                                   | ✓                 | ✓                                                      | ✓                                                                  | ✗                                                                   | NA                                                       | Fair           |

✓ - Yes. ✗ - No. ? - Not reported by the authors in the original manuscript. NA - Not applicable.

Table S3. NHLBI Study Quality Assessment Tool for Observational Cohort and Cross-sectional Studies.

|                             | Research objective stated | Clearly specified study population | ≥50% participation of eligible persons | Subjects recruited from similar populations | Sample size justification provided | Exposure measured before outcome | Sufficient timeframe | Different levels of exposures examined | Defined, valid, reliable, and consistent exposure | Exposures assessed more than once over time | Defined, valid, reliable, and consistent outcome | Blinded outcome assessors | Loss to follow-up ≤20% | Statistically adjusted confounding variables | Overall Rating |
|-----------------------------|---------------------------|------------------------------------|----------------------------------------|---------------------------------------------|------------------------------------|----------------------------------|----------------------|----------------------------------------|---------------------------------------------------|---------------------------------------------|--------------------------------------------------|---------------------------|------------------------|----------------------------------------------|----------------|
| Ba et al., 2021             | ✓                         | ✓                                  | ✓                                      | ✓                                           | ?                                  | ✓                                | ✓                    | ✗                                      | ✓                                                 | ✗                                           | ✓                                                | ?                         | ?                      | ✓                                            | Fair           |
| Htun et al., 2018           | ✓                         | ✓                                  | ?                                      | ✓                                           | ?                                  | ✗                                | ✗                    | ✗                                      | ✓                                                 | ✗                                           | ✓                                                | ?                         | NA                     | ✓                                            | Poor           |
| Lee DH et al., 2019         | ✓                         | ✓                                  | ✓                                      | ✓                                           | ?                                  | ✓                                | ✓                    | ✓                                      | ✓                                                 | ✗                                           | ✓                                                | ✓                         | ✓                      | ✓                                            | Good           |
| Lee KW et al., 2019         | ✓                         | ✓                                  | ✗                                      | ✓                                           | ?                                  | ✓                                | ✓                    | ✗                                      | ✓                                                 | ✗                                           | ✗                                                | ?                         | ✓                      | ✓                                            | Poor           |
| Meneses et al., 2020        | ✓                         | ✓                                  | ?                                      | ✓                                           | ?                                  | ✗                                | ✗                    | ✗                                      | ✗                                                 | NA                                          | ✓                                                | ?                         | NA                     | ✗                                            | Poor           |
| Nanri et al., 2017          | ✓                         | ✓                                  | ✓                                      | ✓                                           | ?                                  | ✓                                | ✓                    | ✗                                      | ✓                                                 | ✗                                           | ✓                                                | ?                         | ?                      | ✓                                            | Fair           |
| Okada et al., 2019          | ✓                         | ✓                                  | ✗                                      | ✓                                           | ?                                  | ✗                                | ✗                    | ✗                                      | ✗                                                 | ✗                                           | ✓                                                | ?                         | NA                     | ✓                                            | Poor           |
| Osonoi et al., 2016         | ✓                         | ✓                                  | ✓                                      | ✓                                           | ?                                  | ✗                                | ✗                    | ✗                                      | ✓                                                 | ✗                                           | ✓                                                | ?                         | NA                     | ✓                                            | Poor           |
| Pounis et al., 2013         | ✓                         | ✓                                  | ✓                                      | ✓                                           | ?                                  | ✗                                | ✗                    | ✓                                      | ✓                                                 | ✗                                           | ✓                                                | ?                         | NA                     | ✓                                            | Poor           |
| Uchiyama et al., 2022       | ✓                         | ✓                                  | ?                                      | ✓                                           | ?                                  | ✗                                | ✗                    | ✓                                      | ✓                                                 | ✗                                           | ✓                                                | ?                         | NA                     | ?                                            | Poor           |
| Weikert et al., 2005 (EPIC) | ✓                         | ✓                                  | ✓                                      | ✓                                           | ?                                  | ✓                                | ✓                    | ✓                                      | ✓                                                 | ✗                                           | ✓                                                | ?                         | ✓                      | ✓                                            | Good           |

✓ - Yes. ✗ - No. ? - Not reported by the authors in the original manuscript. NA - Not applicable.

**Table S4.** NHLBI Study Quality Assessment Tool for Case-Control Studies.

|                                |                             |                                                      |                           |                                                                    |                                                                            |                                                             |                                                             |                            |                                                                           |                                                                |                   |                                                  |                |
|--------------------------------|-----------------------------|------------------------------------------------------|---------------------------|--------------------------------------------------------------------|----------------------------------------------------------------------------|-------------------------------------------------------------|-------------------------------------------------------------|----------------------------|---------------------------------------------------------------------------|----------------------------------------------------------------|-------------------|--------------------------------------------------|----------------|
| Weikert et al., 2005<br>(CORA) | Objective research question | Clearly specified eligibility and selection criteria | Sample size justification | Controls recruited from similar population that gave rise to cases | Valid, reliable, consistent inclusion and exclusion criteria, selection of | Cases were clearly defined and differentiated from controls | Cases and controls randomly selected from eligible subjects | Use of concurrent controls | Confirmation that exposure occurred prior to development of the condition | Clearly defined, valid, reliable, consistent exposure measures | Blinded assessors | Statistically adjusted key confounding variables | Overall rating |
|                                | ✓                           | ✓                                                    | ?                         | ✓                                                                  | ✓                                                                          | ✓                                                           | ✓                                                           | ✓                          | ?                                                                         | ✓                                                              | ?                 | ✓                                                | Fair           |

✓ - Yes. ✗ - No. ? - Not reported by the authors in the original manuscript.

**Table S5.** Change in Systolic Blood Pressures (mmHg).

| Author, Year          | Study type and design | Length of study intervention | Control group          | Change <sup>^</sup> | Main effect of time p-value | Intervention group                     | Change      | Main effect of time p-value | Group by time effect p-value |
|-----------------------|-----------------------|------------------------------|------------------------|---------------------|-----------------------------|----------------------------------------|-------------|-----------------------------|------------------------------|
| Agrawal et al., 2010  | RCT, Parallel         | 3 months                     | Biscuits with ajwain   | 6.9                 | <0.05                       | Biscuits with <i>Pleurotus Spp.</i>    | -5.1        | <0.05                       | <0.001                       |
| Harada et al., 2016   | Exp, Single-arm       | 2 weeks                      | Baseline               | NA                  | NA                          | 5 g/d <i>Grifola gargal</i>            | -0.2        | NS                          | NA                           |
| Maruyama et al., 2021 | RCT, Parallel         | 6 months                     | Partial Japanese Diet  | -4                  | NR                          | Japanese diet (40 ± 33 g/d )           | -5          | NR                          | 0.94                         |
| Poddar et al., 2013%  | RCT, Parallel         | 6 months WL, 6 months WM     | 90% lean beef 3 d/week | 5.5 ± 27.4          | NR                          | 8 oz <i>Agaricus bisporus</i> 3 d/week | -5.9 ± 11.2 | NR                          | 0.15                         |

<sup>^</sup>Data are presented as mean change and standard deviation (when applicable). The mean change was estimated if baseline and post values only were reported. % Results reported for the first 6 month period during the weight loss phase. Abbreviations: NA: not applicable; NS: not significant; NR: not reported; WL: weight loss; WM: weight maintenance.

**Table S6.** Change in Diastolic Blood Pressures (mmHg).

| Author, Year          | Study type and design | Length of study intervention | Control group          | Change^     | Main effect of time p-value | Intervention group                     | Change   | Main effect of time p-value | Group by time effect p-value |
|-----------------------|-----------------------|------------------------------|------------------------|-------------|-----------------------------|----------------------------------------|----------|-----------------------------|------------------------------|
| Agrawal et al., 2010  | RCT, Parallel         | 3 months                     | Biscuits with ajwain   | 4           | <0.05                       | Biscuits with <i>Pleurotus Spp.</i>    | -2.1     | <0.05                       | <0.02                        |
| Harada et al., 2016   | Exp, Single-arm       | 2 weeks                      | Baseline               | NA          | NA                          | 5 g/d <i>Grifola gargal</i>            | -1.6     | NS                          | NA                           |
| Maruyama et al., 2021 | RCT, Parallel         | 6 months                     | Partial Japanese Diet  | -3          | NR                          | Japanese diet (40 ± 33 g/d )           | -3       | NR                          | 0.98                         |
| Poddar et al., 2013%  | RCT, Parallel         | 6 months WL, 6 months WM     | 90% lean beef 3 d/week | -1.8 ± 11.8 | NR                          | 8 oz <i>Agaricus bisporus</i> 3 d/week | -3.7 ± 9 | NR                          | 0.61                         |

^Data are presented as mean change and standard deviation (when applicable). The mean change was estimated if baseline and post values only were reported. % Results reported for the first 6 month period during the weight loss phase. Abbreviations: NA: not applicable; NS: not significant; NR: not reported; WL: weight loss; WM: weight maintenance.

**Table S7.** Change in Total Cholesterol (mg/dL).

| Author, Year           | Study type and design | Length of study intervention | Control group         | Change <sup>^</sup> | Main effect of time p-value | Intervention group                              | Change              | Main effect of time p-value | Group by time effect p-value |
|------------------------|-----------------------|------------------------------|-----------------------|---------------------|-----------------------------|-------------------------------------------------|---------------------|-----------------------------|------------------------------|
| Abrams et al., 2011    | Exp, Single-arm       | 8 weeks                      | Baseline              | NA                  | NA                          | 15 g/d dried <i>Pleurotus ostreatus</i>         | -1.7<br>(-17.4, 14) | NS                          | NA                           |
| Agrawal et al., 2010   | RCT, Parallel         | 3 months                     | Biscuits with ajwain  | 61                  | <0.005                      | Biscuits with <i>Pleurotus Spp.</i>             | -29                 | <0.05                       | <0.001                       |
| Harada et al., 2016    | Exp, Single-arm       | 2 weeks                      | Baseline              | NA                  | NA                          | 5 g/d <i>Grifola gargal</i>                     | -8                  | NS                          | NA                           |
| Maruyama et al., 2021  | RCT, Parallel         | 6 months                     | Partial Japanese Diet | -1                  | NR                          | Japanese diet (40 ± 33 g/d )                    | -11                 | NR                          | 0.033                        |
| Poddar et al., 2013%   | RCT, Parallel         | 0-6 months WL                | 90% lean beef         | $2 \pm 27.6$        | NR                          | 8 oz <i>Agaricus bisporus</i> 3 d/week          | $-1.7 \pm 16.5$     | NR                          | 0.485                        |
|                        |                       | 6-12 months WM               | 3 d/week              | $-0.6 \pm 28.3$     |                             |                                                 | $-4.7 \pm 37.6$     |                             | 0.603                        |
| Spim et al., 2021      | RCT, Parallel         | 66 days                      | Placebo               | 3.9                 | NR                          | 3.5 g/d dried <i>L. edodes</i>                  | 1.4                 | NR                          | 0.5976                       |
| Schneider et al., 2011 | RCT, Parallel         | 21 days                      | Placebo               | $-6 \pm 28$         | 0.504                       | Soup with 30 g dried <i>Pleurotus ostreatus</i> | $-18 \pm 27$        | 0.059                       | 0.335                        |

<sup>^</sup>Data are presented as mean change and variance (SD or 95% confidence interval, when applicable). The mean change was estimated if baseline and post values only were reported. % Results reported for the first 6 month period during the weight loss phase. Abbreviations: NA: not applicable; NS: not significant; NR: not reported; WL: weight loss; WM: weight maintenance.

**Table S8.** Change in HDL Cholesterol (mg/dL).

| Author, Year           | Study type and design        | Length of study intervention | Control group          | Change <sup>^</sup> | Main effect of time p-value | Intervention group                                            | Change             | Main effect of time p-value | Group by time effect p-value |
|------------------------|------------------------------|------------------------------|------------------------|---------------------|-----------------------------|---------------------------------------------------------------|--------------------|-----------------------------|------------------------------|
| Abrams et al., 2011    | Exp, Single-arm              | 8 weeks                      | Baseline               | NA                  | NA                          | 15 g/d dried <i>Pleurotus ostreatus</i>                       | 2.6<br>(-0.1, 5.2) | NS                          | NA                           |
| Agrawal et al., 2010   | RCT, Parallel                | 3 months                     | Biscuits with ajwain   | -7.7                | <0.005                      | Biscuits with <i>Pleurotus Spp.</i>                           | 3.5                | <0.05                       | <0.001                       |
| Harada et al., 2016    | Exp, Single-arm              | 2 weeks                      | Baseline               | NA                  | NA                          | 5g/d <i>Grifola gargal</i>                                    | 2.8                | NS                          | NA                           |
| Maruyama et al., 2021  | RCT, Parallel                | 6 months                     | Partial Japanese Diet  | 1                   | NR                          | Japanese diet (40 ± 33 g/d )                                  | -1                 | NR                          | 0.25                         |
| Mehrotra et al., 2014  | RCT, Parallel (pre vs. post) | 16 weeks                     | Baseline               | NA                  | NA                          | 100 g/d UV treated mushrooms (500 IU D <sub>2</sub> )         | -1                 | NS                          | 0.29                         |
|                        |                              |                              |                        |                     |                             | 100 g/d UV treated mushrooms (2600 IU D <sub>2</sub> )        | 1                  |                             |                              |
|                        |                              |                              |                        |                     |                             | 100 g/d untreated mushrooms + 1200 IU D <sub>3</sub> capsules | -2                 |                             |                              |
|                        |                              |                              |                        |                     |                             | 100 g/d untreated mushrooms + 7300 IU D <sub>3</sub> capsules | 0                  |                             |                              |
| Poddar et al., 2013    | RCT, Parallel                | 0-6 months WL                | 90% lean beef 3 d/week | NR                  | NA                          | 8 oz <i>Agaricus bisporus</i> 3 d/week                        | 1.7                | NR                          | 0.195                        |
|                        |                              | 0-12 months WL+WM            |                        |                     |                             |                                                               | 4.7                |                             | 0.007                        |
| Spim et al., 2021      | RCT, Parallel                | 66 days                      | Placebo                | -4.3                | NR                          | 3.5 g/d dried <i>L. edodes</i>                                | -2.4               | NR                          | 0.4335                       |
| Schneider et al., 2011 | RCT, Parallel                | 21 days                      | Placebo                | -2.3 ± 6.2          | 0.279                       | Soup with 30g dried <i>Pleurotus ostreatus</i>                | -1.2 ± 6.6         | 0.571                       | 0.705                        |

<sup>^</sup>Data are presented as mean change and variance (SD or 95% confidence interval, when applicable). The mean change was estimated if baseline and post values only were reported. Abbreviations: NA: not applicable; NS: not significant; NR: not reported; UV: ultraviolet; WL: weight loss; WM: weight maintenance.



**Table S9.** Change in LDL Cholesterol (mg/dL).

| Author, Year           | Study type and design | Length of study intervention | Control group         | Change <sup>^</sup> | Main effect of time p-value | Intervention group                             | Change           | Main effect of time p-value | Group by time effect p-value |
|------------------------|-----------------------|------------------------------|-----------------------|---------------------|-----------------------------|------------------------------------------------|------------------|-----------------------------|------------------------------|
| Abrams et al., 2011    | Exp, Single-arm       | 8 weeks                      | Baseline              | NA                  | NA                          | 15 g/d dried <i>Pleurotus ostreatus</i>        | 6.9 (-9.3, 23.1) | NS                          | NA                           |
| Agrawal et al., 2010   | RCT, Parallel         | 3 months                     | Biscuits with ajwain  | 5                   | <0.02                       | Biscuits with <i>Pleurotus Spp.</i>            | -6.1             | <0.05                       | <0.001                       |
| Harada et al., 2016    | Exp, Single-arm       | 2 weeks                      | Baseline              | NA                  | NA                          | 5g/d <i>Grifola gargal</i>                     | -6.4             | NS                          | NA                           |
| Maruyama et al., 2021  | RCT, Parallel         | 6 months                     | Partial Japanese Diet | 1                   | NR                          | Japanese diet (40 ± 33 g/d )                   | -8               | NR                          | 0.043                        |
| Poddar et al., 2013    | RCT, Parallel         | 6 months WL                  | 90% lean beef         | 1.3 ± 24            | NR                          | 8 oz <i>Agaricus bisporus</i>                  | -1.2 ± 18.5      | NR                          | 0.611                        |
|                        |                       | 6 months WM                  | 3 d/week              | -5 ± 30.4           |                             | 3 d/week                                       | -6.7 ± 33.2      |                             | 0.82                         |
| Spim et al., 2021      | RCT, Parallel         | 66 days                      | Placebo               | -5.2                | NR                          | 3.5 g/d dried <i>L. edodes</i>                 | 7.4              | NR                          | 0.3041                       |
| Schneider et al., 2011 | RCT, Parallel         | 21 days                      | Placebo               | -1.9 ± 20.1         | 0.762                       | Soup with 30g dried <i>Pleurotus ostreatus</i> | -8.9 ± 19.3      | 0.180                       | 0.450                        |

<sup>^</sup>Data are presented as mean change and variance (SD or 95% confidence interval, when applicable). The mean change was estimated if baseline and post values only were reported. Abbreviations: NA: not applicable; NS: not significant; NR: not reported; WL: weight loss; WM: weight maintenance.

**Table S10.** Change in Triglycerides (mg/dL).

| Author, Year           | Study type and design        | Length of study intervention | Control group          | Change^   | Main effect of time p-value | Intervention group                                            | Change             | Main effect of time p-value | Group by time effect p-value |
|------------------------|------------------------------|------------------------------|------------------------|-----------|-----------------------------|---------------------------------------------------------------|--------------------|-----------------------------|------------------------------|
| Abrams et al., 2011    | Exp, Single-arm              | 8 weeks                      | Baseline               | NA        | NA                          | 15 g/d dried <i>Pleurotus ostreatus</i>                       | -63 (-120.9, -5.1) | <0.05                       | NA                           |
| Agrawal et al., 2010   | RCT, Parallel                | 3 months                     | Biscuits with ajwain   | 80.5      | <0.02                       | Biscuits with <i>Pleurotus Spp.</i>                           | -53.3              | <0.02                       | <0.001                       |
| Maruyama et al., 2021  | RCT, Parallel                | 6 months                     | Partial Japanese Diet  | -3        | NR                          | Japanese diet (higher intake of mushrooms)                    | -17                | NR                          | 0.023                        |
| Mehrotra et al., 2014  | RCT, Parallel (pre vs. post) | 16 weeks                     | Baseline               | NA        | NA                          | 100 g/d UV treated mushrooms (500 IU D <sub>2</sub> )         | 21                 | <0.05                       | 0.05                         |
|                        |                              |                              |                        |           |                             | 100 g/d UV treated mushrooms (2600 IU D <sub>2</sub> )        | 12                 | NS                          |                              |
|                        |                              |                              |                        |           |                             | 100 g/d untreated mushrooms + 1200 IU D <sub>3</sub> capsules | 55                 |                             |                              |
|                        |                              |                              |                        |           |                             | 100 g/d untreated mushrooms + 7300 IU D <sub>3</sub> capsules | -24                |                             |                              |
| Poddar et al., 2013    | RCT, Parallel                | 0-6 months WL                | 90% lean beef 3 d/week | NR        | NA                          | 8 oz <i>Agaricus bisporus</i> 3 d/week                        | -19.3              | 0.007                       | NA                           |
|                        |                              | 0-12 months WL+WM            |                        |           |                             |                                                               | -19.3              | 0.009                       |                              |
| Spim et al., 2021      | RCT, Parallel                | 66 days                      | Placebo                | 63.2      | NR                          | 3.5 g/d dried <i>L. edodes</i>                                | -18.2              | NR                          | 0.0352                       |
| Schneider et al., 2011 | RCT, Parallel                | 21 days                      | Placebo                | 31 ± 30.1 | 0.011                       | Soup with 30g dried <i>Pleurotus ostreatus</i>                | -38.1 ± 40.7       | 0.015                       | <0.001                       |

<sup>^</sup>Data are presented as mean change and variance (SD or 95% confidence interval, when applicable). The mean change was estimated if baseline and post values only were reported. Abbreviations: NA: not applicable; NS: not significant; NR: not reported; UV: ultraviolet; WL: weight loss; WM: weight maintenance.

**Table S11.** Change in Fasting Glucose (mg/dL).

| Author, Year          | Study type and design | Length of study intervention | Control group             | Change <sup>^</sup> | Main effect of time p-value | Intervention group                         | Change              | Main effect of time p-value | Group by time effect p-value |
|-----------------------|-----------------------|------------------------------|---------------------------|---------------------|-----------------------------|--------------------------------------------|---------------------|-----------------------------|------------------------------|
| Abrams et al., 2011   | Exp, Single-arm       | 8 weeks                      | Baseline                  | NA                  | NA                          | 15 g/d dried <i>Pleurotus ostreatus</i>    | -0.1<br>(-6.3, 6.0) | NS                          | NA                           |
| Agrawal et al., 2010  | RCT, Parallel         | 3 months                     | Biscuits with ajwain      | 84.7                | <0.005                      | Biscuits with <i>Pleurotus Spp.</i>        | -100.9              | <0.005                      | <0.001                       |
| Maruyama et al., 2021 | RCT, Parallel         | 6 months                     | Partial Japanese Diet     | 0                   | NR                          | Japanese diet (higher intake of mushrooms) | -1                  | NR                          | 0.98                         |
| Poddar et al., 2013   | RCT, Parallel         | 0-6 months WL                | 90% lean beef<br>3 d/week | NR                  | NA                          | 8 oz <i>Agaricus bisporus</i><br>3 d/week  | -4.1                | 0.040                       | NA                           |
|                       |                       | 0-12 months WL+WM            |                           |                     |                             |                                            | 1.5                 | 0.739                       |                              |
| Spim et al., 2021     | RCT, Parallel         | 66 days                      | Placebo                   | -1.3                | NR                          | 3.5 g/d dried <i>L. edodes</i>             | 1.6                 | NR                          | 0.4993                       |

<sup>^</sup>Data are presented as mean change and variance (SD or 95% confidence interval, when applicable). The mean change was estimated if baseline and post values only were reported. Abbreviations: NA: not applicable; NS: not significant; NR: not reported; WL: weight loss; WM: weight maintenance.

**Table S12.** Change in HbA1c (%).

| Author, Year          | Study type and design        | Length of study intervention | Control group         | Change <sup>^</sup> | Main effect of time p-value | Intervention group                                            | Change | Main effect of time p-value | Group by time effect p-value |
|-----------------------|------------------------------|------------------------------|-----------------------|---------------------|-----------------------------|---------------------------------------------------------------|--------|-----------------------------|------------------------------|
| Agrawal et al., 2010  | RCT, Parallel                | 3 months                     | Biscuits with ajwain  | 1.4                 | <0.005                      | Biscuits with <i>Pleurotus Spp.</i>                           | -1.0   | <0.05                       | <0.005                       |
| Maruyama et al., 2021 | RCT, Parallel                | 6 months                     | Partial Japanese Diet | 0.1                 | NR                          | Japanese diet (higher intake of mushrooms)                    | 0.1    | NR                          | 0.23                         |
| Mehrotra et al., 2014 | RCT, Parallel (pre vs. post) | 16 weeks                     | Baseline              | NA                  | NA                          | 100 g/d UV treated mushrooms (500 IU D <sub>2</sub> )         | 0.1    | NS                          | 0.62                         |
|                       |                              |                              |                       |                     |                             | 100 g/d UV treated mushrooms (2600 IU D <sub>2</sub> )        | 0.1    |                             |                              |
|                       |                              |                              |                       |                     |                             | 100 g/d untreated mushrooms + 1200 IU D <sub>3</sub> capsules | 0      |                             |                              |
|                       |                              |                              |                       |                     |                             | 100 g/d untreated mushrooms + 7300 IU D <sub>3</sub> capsules | -0.1   |                             |                              |

<sup>^</sup>Data are presented as mean change and variance (SD or 95% confidence interval, when applicable). The mean change was estimated if baseline and post values only were reported. Abbreviations: NA: not applicable; NS: not significant; NR: not reported; UV: ultraviolet.

**Table S13.** Change in hs-CRP (mg/dL).

| Author, Year                  | Study type and design | Length of study intervention | Control group          | Change <sup>^</sup> | Main effect of time p-value | Intervention group                         | Change     | Main effect of time p-value | Group by time effect p-value |
|-------------------------------|-----------------------|------------------------------|------------------------|---------------------|-----------------------------|--------------------------------------------|------------|-----------------------------|------------------------------|
| Dai et al., 2015 <sup>#</sup> | RCT, Parallel         | 4 weeks                      | Baseline               | NA                  | NA                          | 5 and 10 g/d dried <i>L. edodes</i>        | -0.3       | 0.008                       | NA                           |
| Maruyama et al., 2021         | RCT, Parallel         | 6 months                     | Partial Japanese Diet  | 0                   | NR                          | Japanese diet (higher intake of mushrooms) | 0          | NR                          | 0.92                         |
| Poddar et al., 2013           | RCT, Parallel         | 6 months WL                  | 90% lean beef 3 d/week | 1.3 ± 4.7           | NR                          | 8 oz <i>Agaricus bisporus</i> 3 d/week     | -1.2 ± 3.8 | NR                          | 0.015                        |

<sup>^</sup>Data are presented as mean change and variance (SD or 95% confidence interval, when applicable). The mean change was estimated if baseline and post values only were reported. <sup>#</sup>Data from 5 and 10 g/d groups were pooled for analysis. Abbreviations: NA: not applicable; NS: not significant; NR: not reported; WL: weight loss.
